# Supplementary material for: Fabrication of photo-enzyme coupled catalysts with the desired electron transport channel for the high-efficiency synergic degradation of bisphenol A in water
Source: Royal Society of Chemistry journal article supplement (doi:10.1039/d2tc02478k), 2022-01-01
Supplement: d2tc02478k1.pdf [file d2tc02478k1.pdf]

**Supporting information**

**Fabrication of photo-enzyme coupled catalyst with the  
desired electron transport channel for high-efficiency  
synergic degrading bisphenol A in water**

**Xinnan Ma<sup>a</sup>, Jiacong Wu<sup>a</sup>, Juan Han<sup>b</sup>, Lei Wang<sup>a</sup>, Chunmei Li<sup>a,\*</sup>, Yun Wang<sup>a,\*</sup>**

<sup>a</sup>School of Chemistry and Chemical Engineering, Jiangsu University, Zhenjiang, Jiangsu Province

212013, China

<sup>b</sup>School of Food and Biological Engineering, Jiangsu University, Zhenjiang, Jiangsu Province 212

013, China

\* Corresponding author. Tel.: +86 0511 88790683; Fax.: +86 0511 88791800;

E-mail: lichun\_mei\_happy@126.com (Chunmei Li), yunwang@ujs.edu.cn (Yun Wang)

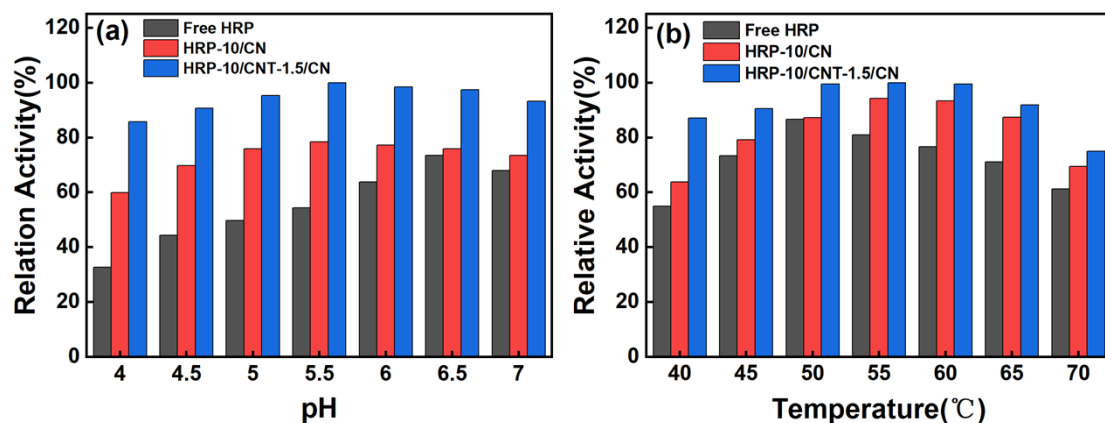

Fig. S1 Effects of (a) pH and (b) temperature on catalytic activity of the samples.

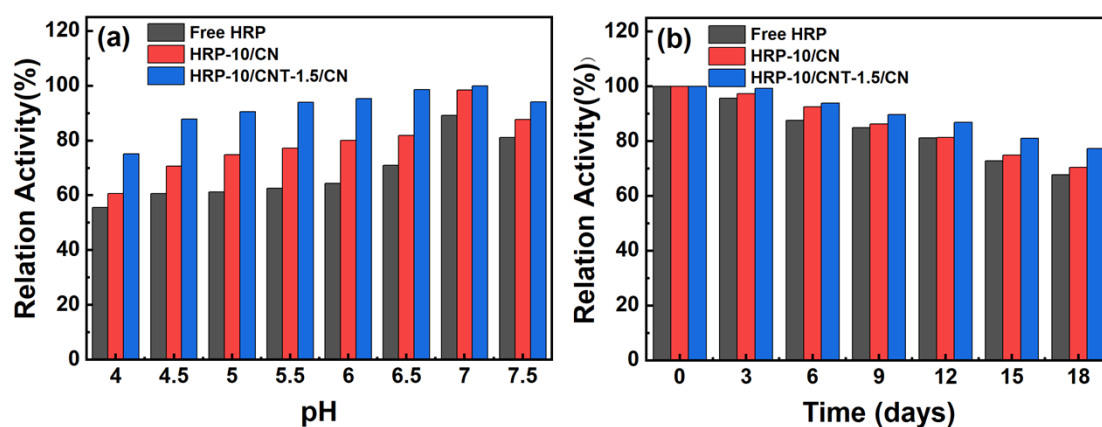

Fig. S2 (a) pH stability and (b) storage stability of free HRP, HRP-10/CN and HRP-10/CNT-1.5/CN.

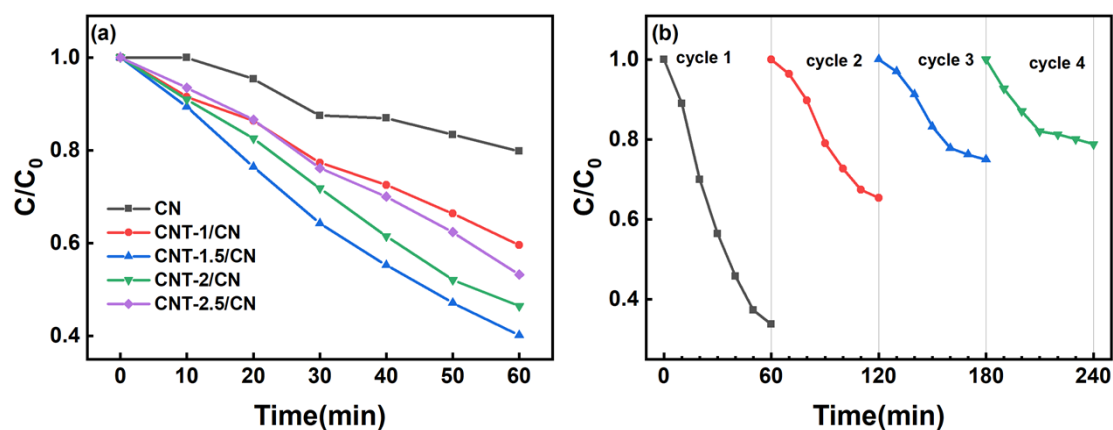

Fig. S3 (a) Degradation dynamic curves of CNT-X/CN with different CNT and (b) Cycle degradation dynamic curves of BPA over HRP-10/CN.

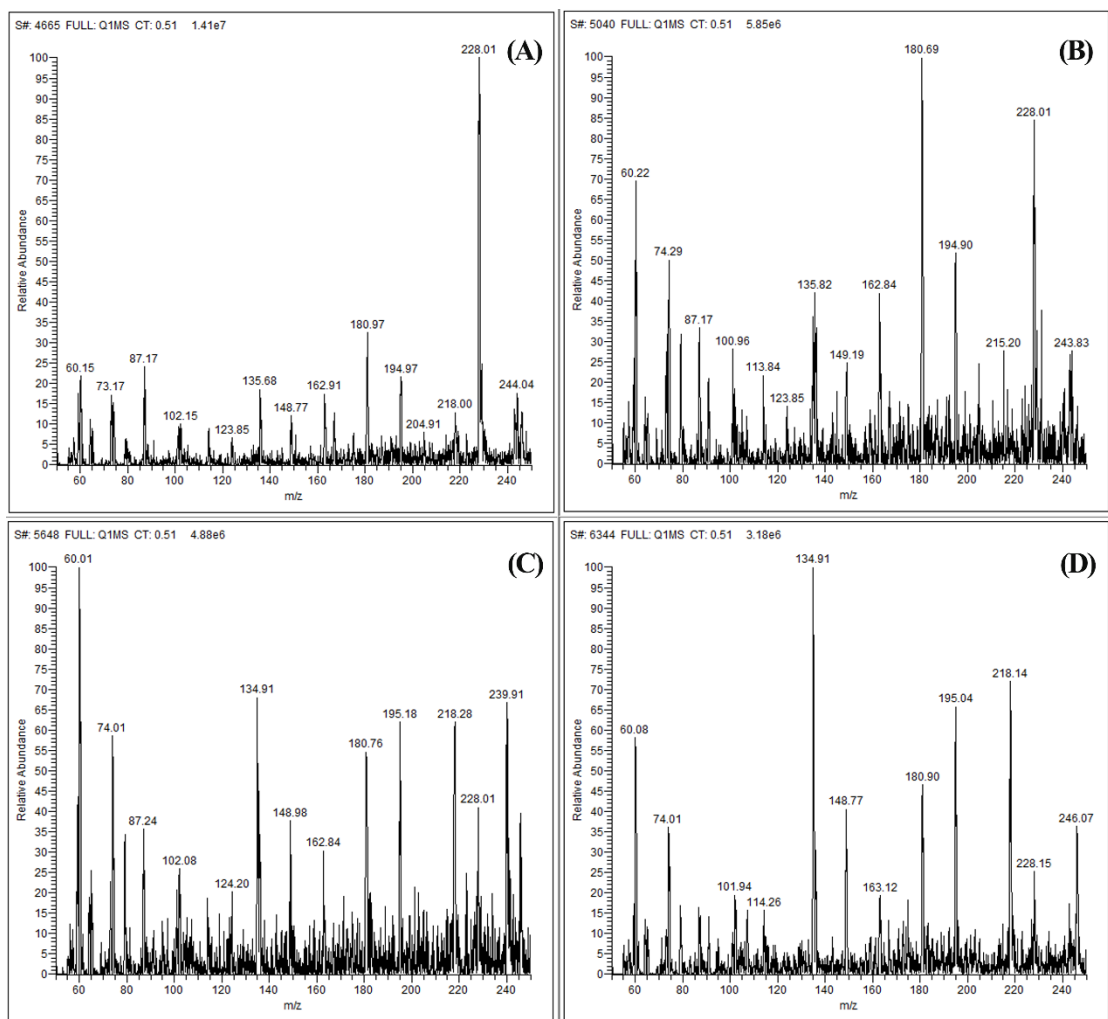

Fig. S4 MS of BPA at degradation time of (a) 0 min, (b) 20 min, 40 min and 60 min over HRP-10/CNT-1.5/CN sample.

Table. S1 BET surface area, and pore size data of samples

| Sample            | $S_{\text{BET}}$<br>( $\text{m}^2 \text{g}^{-1}$ ) | Average<br>pore volume<br>( $\text{cm}^3 \text{g}^{-1}$ ) | Average<br>pore size<br>(nm) |
|-------------------|----------------------------------------------------|-----------------------------------------------------------|------------------------------|
| CN                | 81.0697                                            | 0.281029                                                  | 13.5039                      |
| CNT-1.5/CN        | 82.3503                                            | 0.352053                                                  | 18.0646                      |
| HRP-10/CNT-1.5/CN | 81.9249                                            | 0.343211                                                  | 18.1439                      |

Table. S2 Kinetic constants of free HRP, HRP-10/CN and HRP-10/CNT-1.5/CN

| Sample            | $V_m(\text{M min}^{-1})$ | $K_m(\text{M})$ | $K_{\text{cat}}(\text{s}^{-1})$ | $K_{\text{cat}}/K_m(\text{s}^{-1}\text{M}^{-1})$ |
|-------------------|--------------------------|-----------------|---------------------------------|--------------------------------------------------|
| free HRP          | 0.558                    | 3.75            | 0.0326                          | 0.00871                                          |
| HRP-10/CN         | 0.972                    | 5.36            | 0.0568                          | 0.0106                                           |
| HRP-10/CNT-1.5/CN | 0.961                    | 5.10            | 0.0561                          | 0.0110                                           |

Table. S3 The pseudo-first order rate constants of BPA degradation by various photocatalysts.

| Samples           | $k$ (min <sup>-1</sup> ) | R <sup>2</sup> |
|-------------------|--------------------------|----------------|
| CN                | 0.00365                  | 0.95009        |
| CNT-1.5/CN        | 0.0153                   | 0.99423        |
| HRP-10/CNT-1.5/CN | 0.0311                   | 0.97839        |
